# Supplementary material for: Heterogeneity of a dwarf phenotype in Dutch traditional chicken breeds revealed by genomic analyses
Source: PubMed Central journal article supplement (PMC8061282; doi:10.1111/eva.13183), 2021-01-19
Supplement: EVA-14-1095-s002.pdf [file EVA-14-1095-s002.pdf]

The description of Dutch chicken breed, the corresponding standard body weight (in gram), and the calculated mean reduced ratio of body weight. For more characteristics of breeds, please refer to [www.fao.org/dad-is](http://www.fao.org/dad-is).

| Breed Abbr. | Breed(in Dutch)                 | Size   | Hen weight(g) | Rooster weight(g) | Mean reduced ratio | Hen ringsize(mm) | Rooster ringsize (mm) | Info                                                                                                                                                                                                                                                                                                                                                                  |
|-------------|---------------------------------|--------|---------------|-------------------|--------------------|------------------|-----------------------|-----------------------------------------------------------------------------------------------------------------------------------------------------------------------------------------------------------------------------------------------------------------------------------------------------------------------------------------------------------------------|
| AssFw       | Assendelfter                    | Normal | 1300          | 1700              |                    | 15               | 13                    | <a href="https://dier-en-natuur.infonu.nl/huisdieren/185933-kippenras-assendelfter.html#karakter">https://dier-en-natuur.infonu.nl/huisdieren/185933-kippenras-assendelfter.html#karakter</a>                                                                                                                                                                         |
| AssFwB      | Assendelfter kriel              | Bantam | 550           | 650               | 59.73%             | 10               | 11                    | <a href="https://www.kippenpagina.nl/kippenrassen/assendelfterkrielen.html">https://www.kippenpagina.nl/kippenrassen/assendelfterkrielen.html</a>                                                                                                                                                                                                                     |
| Barnev      | Barnevelder                     | Normal | 2750          | 3500              |                    | 18               | 20                    | <a href="https://dier-en-natuur.infonu.nl/dieren/185918-kippenras-barnevelder.html">https://dier-en-natuur.infonu.nl/dieren/185918-kippenras-barnevelder.html</a>                                                                                                                                                                                                     |
| BarnevB     | barnevelderkriel                | Bantam | 900-1000      | 1100-1200         | 66.30%             | 13               | 15                    | <a href="https://dier-en-natuur.infonu.nl/dieren/185945-kippenras-barnevelderkriel.html">https://dier-en-natuur.infonu.nl/dieren/185945-kippenras-barnevelderkriel.html</a>                                                                                                                                                                                           |
| Brab        | Brabanter                       | Normal | 2000          | 2500              |                    | 16               | 19                    | <a href="https://dier-en-natuur.infonu.nl/dieren/185925-kippenras-brabanter.html">https://dier-en-natuur.infonu.nl/dieren/185925-kippenras-brabanter.html</a>                                                                                                                                                                                                         |
| BrabB       | Brabanterkriel                  | Bantam | 750           | 1000              | 61.25%             | NA               | NA                    | <a href="https://dier-en-natuur.infonu.nl/dieren/185943-kippenras-brabanterkriel.html">https://dier-en-natuur.infonu.nl/dieren/185943-kippenras-brabanterkriel.html</a>                                                                                                                                                                                               |
| BreFw       | Kraaikop                        | Normal | 1750-2250     | 2500-3000         |                    | NA               | NA                    | <a href="https://dier-en-natuur.infonu.nl/dieren/185930-kippenras-kraaikop.html">https://dier-en-natuur.infonu.nl/dieren/185930-kippenras-kraaikop.html</a>                                                                                                                                                                                                           |
| BreFwB      | Kraaikopkriel                   | Bantam | 800-900       | 900-1000          | 61.48%             | NA               | NA                    | <a href="https://dier-en-natuur.infonu.nl/dieren/185941-kippenras-kraaikopkriel.html">https://dier-en-natuur.infonu.nl/dieren/185941-kippenras-kraaikopkriel.html</a>                                                                                                                                                                                                 |
| DB          | Hollandse kriel                 | Bantam | 400-450       | 500-550           |                    | NA               | NA                    | <a href="http://www.kurkiminiaturki.eu/holkriel.html">http://www.kurkiminiaturki.eu/holkriel.html</a>                                                                                                                                                                                                                                                                 |
| DFw         | Hollands hoen                   | Normal | 1800          | 2500              |                    | NA               | NA                    | <a href="https://dier-en-natuur.infonu.nl/dieren/185924-kippenras-hollands-hoen-of-hamburgh.html">https://dier-en-natuur.infonu.nl/dieren/185924-kippenras-hollands-hoen-of-hamburgh.html</a>                                                                                                                                                                         |
| DFwB        | Hollandse hoenkriel             | Bantam | 700-800       | 800-900           | 62.17%             | NA               | NA                    | <a href="https://dier-en-natuur.infonu.nl/dieren/185934-kippenras-hollandse-hoenkriel-of-hamburgh-kriel.html">https://dier-en-natuur.infonu.nl/dieren/185934-kippenras-hollandse-hoenkriel-of-hamburgh-kriel.html</a>                                                                                                                                                 |
| DOwBd       | Nederlandse uilebaard           | Normal | 1500-2000     | 1900-2500         |                    | 16               | 18                    | <a href="https://dier-en-natuur.infonu.nl/huisdieren/185927-kippenras-nederlandse-uilebaard.html">https://dier-en-natuur.infonu.nl/huisdieren/185927-kippenras-nederlandse-uilebaard.html</a>                                                                                                                                                                         |
| DOwBdB      | Nederlandse uilebaardkriel      | Bantam | 700           | 800               | 61.82%             | 11               | 13                    | <a href="http://www.kippenpagina.nl/kippenrassen/nederlandseuilebaardkrielen.html">http://www.kippenpagina.nl/kippenrassen/nederlandseuilebaardkrielen.html</a>                                                                                                                                                                                                       |
| DPBd        | Nederlandse baardkuifoenders    | Normal | 1500-1700     | 2000-2300         |                    | 16               | 18                    | <a href="http://www.kuifoenderclub.nl/site/">http://www.kuifoenderclub.nl/site/</a>                                                                                                                                                                                                                                                                                   |
| DPBdB       | Nederlandse baardkuifoenkrielen | Bantam | 700-800       | 900-1000          | 54.47%             | 12               | 13                    | <a href="http://www.kuifoenderclub.nl/site/">http://www.kuifoenderclub.nl/site/</a>                                                                                                                                                                                                                                                                                   |
| DPnBd       | Hollandse kuifhoenders          | Normal | 1400-1600     | 1900-2200         |                    | 15               | 16                    | <a href="http://www.kuifoenderclub.nl/site/">http://www.kuifoenderclub.nl/site/</a>                                                                                                                                                                                                                                                                                   |
| DPnBdB      | Hollandse kuifhoenkrielen       | Bantam | 700-800       | 800-900           | 54.27%             | 11               | 13                    | <a href="http://www.kuifoenderclub.nl/site/">http://www.kuifoenderclub.nl/site/</a>                                                                                                                                                                                                                                                                                   |
| DrFw        | Drentse hoen                    | Normal | 1500          | 1900              |                    | 13               | 15                    | <a href="https://dier-en-natuur.infonu.nl/dieren/185923-kippenras-drentse-hoen-en-drentse-bolstaarchoen.html">https://dier-en-natuur.infonu.nl/dieren/185923-kippenras-drentse-hoen-en-drentse-bolstaarchoen.html</a>                                                                                                                                                 |
| DrFwB       | Drentse kriel                   | Bantam | 600-700       | 700-800           | 58.60%             | 11               | 13                    | <a href="https://dier-en-natuur.infonu.nl/dieren/185932-kippenras-drentse-kriel-en-drentse-bolstaarchoen.html">https://dier-en-natuur.infonu.nl/dieren/185932-kippenras-drentse-kriel-en-drentse-bolstaarchoen.html</a> <a href="https://www.kippenpagina.nl/kippenrassen/drentshoenkrielen.html">https://www.kippenpagina.nl/kippenrassen/drentshoenkrielen.html</a> |
| Eikenb      | Eikenburger kriel               | Bantam | 550           | 650               |                    | 11               | 12                    | <a href="https://www.kippenpagina.nl/kippenrassen/eikenburgerkriel.html">https://www.kippenpagina.nl/kippenrassen/eikenburgerkriel.html</a>                                                                                                                                                                                                                           |
| FriFw       | Fries hoen                      | Normal | 1400          | 1600              |                    | NA               | NA                    | <a href="https://dier-en-natuur.infonu.nl/dieren/185922-kippenras-fries-hoen.html">https://dier-en-natuur.infonu.nl/dieren/185922-kippenras-fries-hoen.html</a>                                                                                                                                                                                                       |
| FriFwB      | Friese hoenkriel                | Bantam | 600-700       | 700-800           | 53.35%             | NA               | NA                    | <a href="https://dier-en-natuur.infonu.nl/dieren/185939-kippenras-friese-kriel-of-friese-hoenkriel.html">https://dier-en-natuur.infonu.nl/dieren/185939-kippenras-friese-kriel-of-friese-hoenkriel.html</a>                                                                                                                                                           |
| GrMw        | Groninger meeuw                 | Normal | 1600-1800     | 1800-2100         |                    | NA               | NA                    | <a href="https://zeldzamerassen.nl/groningermeeuwenclub/beschrijving/">https://zeldzamerassen.nl/groningermeeuwenclub/beschrijving/</a>                                                                                                                                                                                                                               |
| GrMwB       | Groninger meeuw kriel           | Bantam | 700           | 800               | 58.90%             | NA               | NA                    | <a href="https://zeldzamerassen.nl/groningermeeuwenclub/beschrijving/">https://zeldzamerassen.nl/groningermeeuwenclub/beschrijving/</a>                                                                                                                                                                                                                               |
| Jav         | Java bantam                     | Bantam | 500-550       | 600-675           |                    | NA               | NA                    | <a href="https://dier-en-natuur.infonu.nl/dieren/192071-kippenras-javakriel.html">https://dier-en-natuur.infonu.nl/dieren/192071-kippenras-javakriel.html</a>                                                                                                                                                                                                         |
| KraiK       | Twents hoen                     | Normal | 2000-2500     | 3000              |                    | 16               | 20                    | <a href="https://dier-en-natuur.infonu.nl/dieren/185947-kippenras-twents-hoen.html">https://dier-en-natuur.infonu.nl/dieren/185947-kippenras-twents-hoen.html</a>                                                                                                                                                                                                     |
| KraiKFwB    | Twents kriel                    | Bantam | 750-900       | 850-1100          | 65.42%             | 11               | 13                    | <a href="https://dier-en-natuur.infonu.nl/huisdieren/185940-kippenras-twents-kriel.html">https://dier-en-natuur.infonu.nl/huisdieren/185940-kippenras-twents-kriel.html</a>                                                                                                                                                                                           |
| LakVe       | Lakenvelder                     | Normal | 1600          | 2000              |                    | NA               | NA                    | <a href="https://dier-en-natuur.infonu.nl/dieren/185944-kippenras-lakenvelder.html">https://dier-en-natuur.infonu.nl/dieren/185944-kippenras-lakenvelder.html</a> <a href="https://nl.wikipedia.org/wiki/Lakenvelder_(kip)">https://nl.wikipedia.org/wiki/Lakenvelder_(kip)</a>                                                                                       |
| LakVeB      | Lakenvelderkriel                | Bantam | 700           | 800               | 58.13%             | NA               | NA                    | <a href="https://dier-en-natuur.infonu.nl/dieren/185938-kippenras-lakenvelderkriel.html">https://dier-en-natuur.infonu.nl/dieren/185938-kippenras-lakenvelderkriel.html</a>                                                                                                                                                                                           |
| NHB1        | Noord-Hollands hoen             | Normal | 3000-3500     | 3500-4000         |                    | NA               | NA                    | <a href="https://dier-en-natuur.infonu.nl/dieren/185937-kippenras-noord-hollandse-blauwe-of-noord-hollands-hoen.html">https://dier-en-natuur.infonu.nl/dieren/185937-kippenras-noord-hollandse-blauwe-of-noord-hollands-hoen.html</a>                                                                                                                                 |

|                 |                       |        |           |           |        |    |    |                                                                                                                                                                                                                                                                                         |
|-----------------|-----------------------|--------|-----------|-----------|--------|----|----|-----------------------------------------------------------------------------------------------------------------------------------------------------------------------------------------------------------------------------------------------------------------------------------------|
| NHB1B           | Noord-Hollandse kriel | Bantam | 850-950   | 1000      | 72.82% | NA | NA | <a href="https://dier-en-natuur.infonu.nl/dieren/185928-kippenras-noord-hollandse-kriel.html">https://dier-en-natuur.infonu.nl/dieren/185928-kippenras-noord-hollandse-kriel.html</a>                                                                                                   |
| Sasch           | Sumatra               | Normal | 2250      | 2500      |        | NA | NA | <a href="https://dier-en-natuur.infonu.nl/dieren/188263-kippenras-sumatra-het-zwarte-vechthoen.html">https://dier-en-natuur.infonu.nl/dieren/188263-kippenras-sumatra-het-zwarte-vechthoen.html</a>                                                                                     |
| SBgschs/SBsschs | Sebright              | Bantam | 525-575   | 627-675   |        | NA | NA | <a href="https://dier-en-natuur.infonu.nl/huisdieren/192911-kippenras-sebright.html">https://dier-en-natuur.infonu.nl/huisdieren/192911-kippenras-sebright.html</a>                                                                                                                     |
| Schijd          | Schijndelaar          | Normal | 1500-2000 | 2000-2500 |        |    | 17 | <a href="https://www.kippenpagina.nl/kippenrassen/schijndelaar.html">https://www.kippenpagina.nl/kippenrassen/schijndelaar.html</a><br><a href="http://www.oasll.com/schijndelaar.html">http://www.oasll.com/schijndelaar.html</a>                                                      |
| SchjdB          | Schijndelaar kriel    | Bantam | NA        | NA        |        | NA | NA | A bantam version is also available for this breed, but it hasn't been standardized completely yet.                                                                                                                                                                                      |
| Welsum          | Welsumer              | Normal | 2000-2500 | 2750-3250 |        |    | 18 | <a href="https://www.kippenpagina.nl/kippenrassen/welsumer.html">https://www.kippenpagina.nl/kippenrassen/welsumer.html</a> <a href="https://dier-en-natuur.infonu.nl/dieren/185946-kippenras-welsumer.html">https://dier-en-natuur.infonu.nl/dieren/185946-kippenras-welsumer.html</a> |
| WelsumB         | Welsumerkriel         | Bantam | 900-1000  | 1000-1200 | 60.56% |    | 13 | <a href="https://dier-en-natuur.infonu.nl/huisdieren/192896-kippenras-welsumerkriel.html">https://dier-en-natuur.infonu.nl/huisdieren/192896-kippenras-welsumerkriel.html</a>                                                                                                           |
